# Supplementary material for: Persistent HIV-infected cells in cerebrospinal fluid are associated with poorer neurocognitive performance
Source: JCI journal article supplement (doi:10.1172/jci127413), 2019-07-14
Supplement: sd2 [file 2]

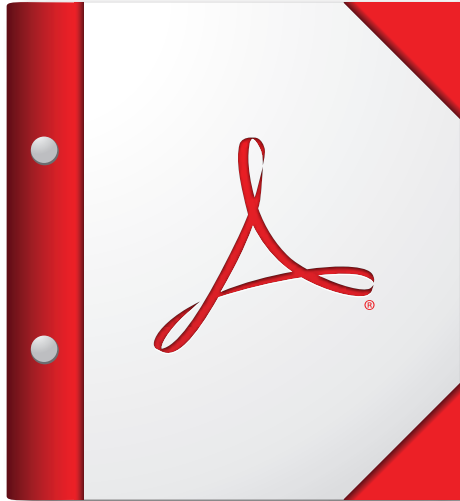

**For the best experience, open this PDF portfolio in  
Acrobat X or Adobe Reader X, or later.**

[Get Adobe Reader Now!](#)
